# Supplementary material
Source: publisher figshare collection journal article supplement (https://acs.figshare.com/ndownloader/files/4612654)

# Role of the Nitro Functionality in the DNA Binding of 3-Nitro-10-methylbenzothiazolo[3,2-*a*]quinolinium Chloride

Iris Gisela Colón,<sup>¶</sup> Fernando A. González,<sup>¶</sup> Marisol Cordero,<sup>¶</sup> Beatriz Zayas,<sup>‡</sup> Christian Velez,<sup>¶</sup>  
Osvaldo Cox,<sup>¥</sup> Ajay Kumar<sup>¥</sup> and Antonio E. Alegría<sup>¥\*</sup>

<sup>¶</sup>Department of Chemistry, University of Puerto Rico, Río Piedras Campus, San Juan,  
Puerto Rico 00931.

<sup>‡</sup>School of Environmental Affairs, Universidad Metropolitana, San Juan, Puerto Rico  
00928

<sup>¥</sup>Department of Chemistry, University of Puerto Rico at Humacao, Humacao, Puerto  
Rico 00791

## Supporting Information

**Figure S1.** Sephadex size exclusion chromatography of quinolinium salts in the presence or absence of CT-DNA, HX, and XO. The amount of quinolinium salt eluted was determined by measuring the absorbance of the solutions before and after Sephadex size exclusion chromatography of the samples and calculating the percent of the total BQCl that was not retained in the chromatographic columns (**Elution %**). Solutions contained (1) 100  $\mu\text{M}$  of the respective BQCl, (2) 100  $\mu\text{M}$  of the respective BQCl and 2000  $\mu\text{M}$  CT-DNA, (3) 100  $\mu\text{M}$  of the respective BQCl, 300  $\mu\text{M}$  HX and 300 mU / mL XO, and (4) 100  $\mu\text{M}$  of the respective BQCl, 300  $\mu\text{M}$  HX, 300 mU / mL XO, and 2000  $\mu\text{M}$  DNA. Data shown are representative of three independent measurements.

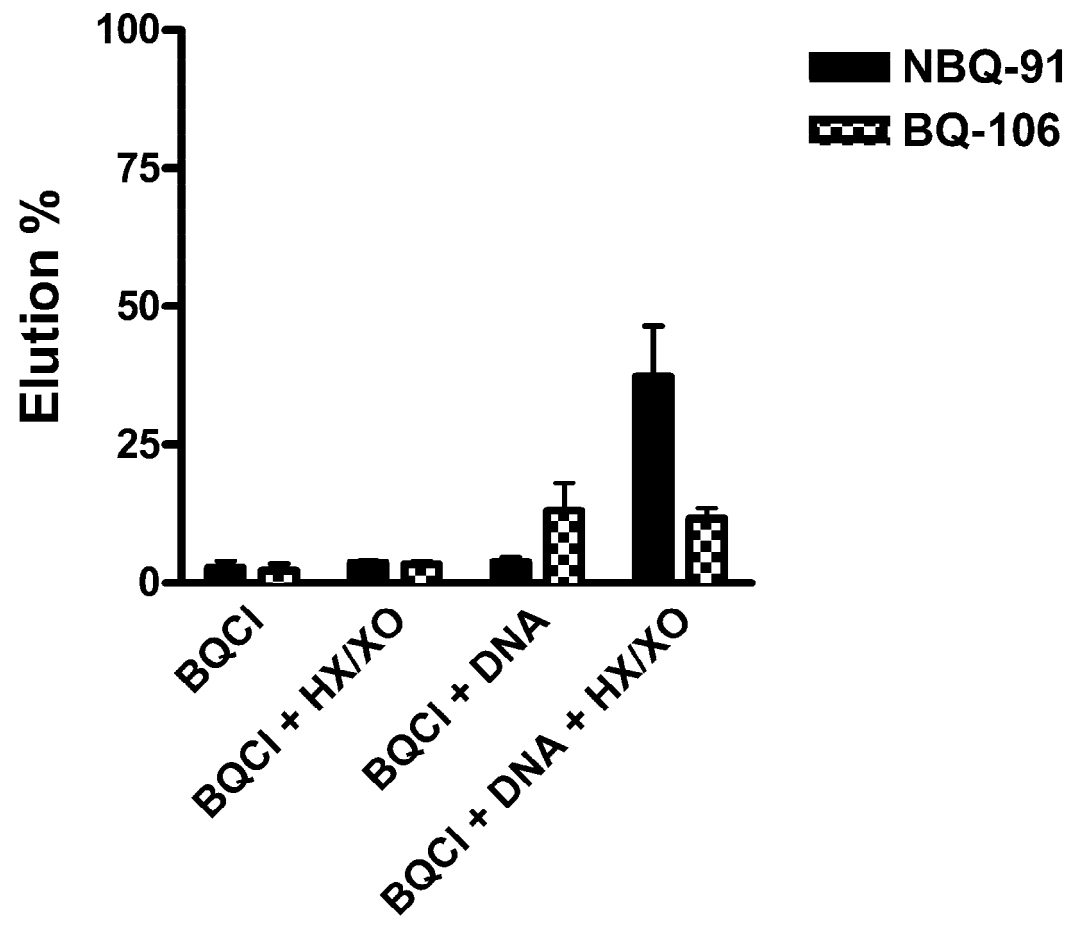

Supplement: Supplementary file 1 [file 4612654]
